# Supplementary material for: PLAC8 Localizes to the Inner Plasma Membrane of Pancreatic Cancer Cells and Regulates Cell Growth and Disease Progression through Critical Cell-Cycle Regulatory Pathways
Source: Oxford University Press journal article supplement (doi:10.1158/0008-5472.can-15-0216), 2015-12-15
Supplement: 00085472can150216-sup-144283_2_supp_3099108_nsyxkm.xlsx [file 00085472can150216-sup-144283_2_supp_3099108_nsyxkm.xlsx]

## Sheet: antibodies
	#	Antigen	Ab type	Uniprot #	WB Score	RPA dilution	Assay #	Effect siRNA
	4	Akt	rbm	P31749	1	200	1	▬
	5	Akt-P-Ser473	rbm	P31749	1	100	1	▬
	44	c-Raf	rb	P04049	2	100	1	▬		(▼)	weak/questionable effect
	45	c-Raf-P-Ser259	rb	P04049	2	100	1	▬		(▲)	weak/questionable effect
	46	c-Raf-P-Ser338	rb	P04049	2	100	1	▬
	49	CyclinD1	ms	P24385	2	400	1	▬		▼	low
	63	EGFR	rbm	P00533	1	50	1	(▲)		▼▼	medium
	64	EGFR-P-Tyr1068	rb	P00533	1	50	1	▬		▼▼▼	high down-regulation
	65	EGFR-P-Tyr845	rb	P00533	2	50	1	(▲)
	66	EGFR-P-Tyr992	rb	P00533	1	50	1	▬
	72	Erk1	rb	P27361	1	200	1	▬		▲	low
	73	Erk1/2	rbm	P27361, P28482	1	200	1	▬		▲▲	medium
	74	Erk1/2-P-Thr202/Tyr204	rbm	P27361, P28482	1	50	1	▬		▲▲▲	high up-regulation
	75	Erk2	rb	P28482	2	200	1	▬
	103	IGF1Receptor	rb	P08069	2	200	1	▬
	118	MEK1	rb	Q02750	1	100	1	▬		▬	no effect
	119	MEK1/2-P-Ser217/221	rbm	Q02750, P36507	1	100	1	▬
	120	MEK2	rb	P36507	1	200	1	▬
	129	mTOR-P-Ser2448	rb	P42345	2	100	1	▬		rb=rabbit polyclonal
	130	mTOR-P-Ser2481	rb	P42345	2	100	1	▬		rbm=rabbit monoclonal
	139	p38/MAPK	rb	Q16539	1	200	1	▬		ms=mouse monoclonal
	140	p38/MAPK-P-Thr180/Tyr182	rb	Q16539	1	100	1	▲▲
	144	p70S6kinase	rbm	P23443	1	200	1	▬
	145	p70S6kinase-P-Thr389	ms	P23443	2	500	1	(▲)
	155	PERK	rbm	Q9NZJ5	1	100	1	▬
	157	PI3kinase-p85alpha	rbm	P27986	1	200	1	▬
	168	PTEN	rb	P60484	1	200	1	▼▲
	10	Bcl2	rbm	P10415	2	100	2	▬
	23	Caspase3	rb	P42574	1	100	2	▬
	24	Caspase3-cleaved-Asp175	rb	P42574	1	50	2	▬
	41	c-Met	ms	P08581	2	100	2	▬
	42	c-myc	rb	P01106	2	100	2	▬
	43	c-myc-P-Thr58/Ser62	rbm	P01106	1	50	2	▬
	77	GSK3alpha/beta-P-Tyr279/216	rbm	P49840, P49841	1	50	2	▬
	78	GSK3beta	rb	P49841	1	100	2	▬
	79	GSK3beta-P-Ser9	rb	P49841	1	50	2	▼siRNA1+3
	80	Ha-ras	rbm	P01112	1	100	2	▬
	81	Her2	rb	P04626	1	100	2	▬
	104	IGFBP2	rb	P18065	1	100	2	▬
	117	MDM2-P-Ser166	rb	Q00987	2	50	2	▬
	121	MEKK3	ms	Q99759	2	100	2	▬
	122	MKK3/6-P-Ser189/207	rbm	P46734, P52564	2	50	2	▬
	123	MKK4	rbm	P45985	1	100	2	▬
	124	MKK4-P-Ser257/Thr261	rbm	P45985	2	50	2	▬
	125	MKK6	rb	P52564	1	100	2	▬
	126	MLK3	rbm	Q16584	1	100	2	▬
	128	mTOR	rbm	P42345	1	100	2	▲siRNA1+3
	158	PKACalpha	rb	P17612	1	100	2	▬
	181	RSK1/RSK2/RSK3	rb	Q15448, Q51812, Q15349	1	100	2	▬
	182	RSK1-P-Ser380	rb	Q15418	1	50	2	▲
	183	RSK1-P-Thr573	rbm	Q15418	1	50	2	▬
	184	RSK3-P-Thr353/356	rbm	Q9WUT3	1	50	2	▬
	185	RSK4	rbm	Q9UK32	1	100	2	▬
	186	RSK4-P-Ser235	rbm	Q9UK32	1	50	2	▬
	8	AMPKalpha-P-Thr172	rbm	Q13131	1	50	3	▬
	9	Bax	rb	Q13131	1	100	3	▬
	11	Bcl-xL	rbm	Q07812	1	100	3	▲siRNA1
	25	Caspase5	rbm	P51878	2	100	3	▬
	26	Caspase7	rb	P55210	2	100	3	▲
	27	Caspase9	rb	P55211	2	100	3	▬
	38	c-Jun	rbm	P05412	1	100	3	▬
	39	c-Jun-P-Ser63	rbm	P05412	1	50	3	▬
	40	c-Jun-P-Ser73	rb	P05412	1	50	3	▬
	95	HLA-DRalpha	rbm	P01903	2	100	3	▬
	96	HLA-DR-DP-most DQ	ms		1	500	3	▬
	110	Jak1	rbm	P23458	1	100	3	▬
	111	Jak1-P-Tyr1022/1023	rb	P23458	2	100	3	▬
	149	PARP-cleaved-Asp214	rb	P09874	1	50	3	▬
	163	PLCgamma1	rb	P19174	1	100	3	▬
	190	Smad2/3	rb	Q15796, P84022	2	100	3	▬
	191	Smad2-P-Ser245/250/255	rb	Q15796	2	50	3	▬
	192	SOCS3	rb	O14543	1	100	3	▬
	195	Src	rb	P12931	1	100	3	▬
	196	Src-P-Tyr418	rb	P12932	2	50	3	▬
	197	STAT1	rbm	P42224	1	100	3	▬
	198	STAT1-P-Tyr701	rbm	P42224	2	50	3	▬
	199	STAT3	rbm	P40763	1	100	3	▼▲
	200	STAT3-P-Ser727	rb	P40763	1	50	3	▬
	201	STAT3-P-Tyr705	rbm	P40763	1	50	3	▬
	202	STAT6	rb	P42226	2	100	3	▲
	12	beta-Catenin	rb	P35222	1	100	4	▬
	13	beta-Catenin-P-Ser45	rb	P35222	1	50	4	▬
	14	beta-Catenin-P-Ser675	rb	P35222	1	100	4	▬
	15	beta-Catenin-P-Thr41/Ser45	rb	P35222	2	100	4	▬
	22	Caseinkinase2alpha	rb	P68400	1	100	4	▬
	28	CD133	rbm	O43490	2	100	4	▬
	29	CD44variant	ms	P16070	2	100	4	▬
	30	CD45	rbm	P08575	2	100	4	▬
	36	CEA	ms	P06731	1	50	4	▬
	57	DFF45	ms	O00273	1	100	4	▬
	58	DUSP1	rb	P28562	2	100	4	▬
	59	DUSP10	rb	Q9Y6W6	1	100	4	▬
	60	DUSP16	rb	Q9BY84	2	100	4	▲
	61	E-Cadherin	gt	P12830	2	100	4	▬
	76	Glutaminsynthetase	rb	P15104	1	2500	4	▬
	109	IRAK1	rb	P51617	2	100	4	▼siRNA3
	112	JNK/SAPK	rb	P45983	1	100	4	▬
	113	JNK1/JNK2/JNK3-P-Tyr185/223	rbm	P45983, P45984, P53779	2	100	4	▬
	116	LEF1	rbm	Q9UJU2	1	100	4	▬
	127	Mnk1	rbm	Q9BUB5	1	100	4	▬
	131	N-Cadherin	ms	P19022	2	100	4	▬
	132	NFkBp100/p52	rb	Q00653	1	100	4	▲▲
	133	NFkBp105/p50	rb	P19838	1	100	4	▲
	134	NFkBp65	rb	Q04206	1	100	4	▲
	135	NFkBp65-P-Ser536	rbm	Q04206	1	100	4	▬
	141	p53	gt	P04637	2	100	4	▲
	142	p53-P-Ser392	rb	P04637	2	100	4	▲▲
	143	p53-P-Ser6	rb	P04637	2	100	4	▬
	151	PDGFRbeta	rbm	P09619	2	100	4	▲ I
	162	PKR	rb	P19525	1	100	4	▬
	194	SPRY3	rb	O43610	2	100	4	▲ I
	67	eIF2alpha	ms	P05198	1	100	5	▬
	68	eIF2alpha-P-Ser51	rbm	P05199	1	50	5	(▲) I siRNA1
	69	eIF4E	rbm	P06730	1	100	5	▬
	70	eIF4E-P-Ser209	rb	P06731	1	50	5	▲
	105	IkappaBalpha	ms	P25963	1	100	5	▬
	106	IkappaBalpha-P-Ser32	rb	P25963	1	50	5	▬
	107	IKKalpha	rb	O15111	1	100	5	▬
	108	IKKbeta	rb	O14920	1	100	5	▲ I
	146	PAK1/2/3	rb	Q13153, Q13177, O75914	2	100	5	▬
	147	PAK1/2/3-P-Ser141	rb	Q13153, Q13177, O75914	2	500	5	▬
	148	PAK2	rb	Q13177	1	100	5	(▲) I siRNA2+3
	150	PCNA	rt	P12004	1	100	5	▬
	171	Pyk2/FAK2	rbm	Q14289	1	100	5	▬
	193	SPRY2	rb	O43597	1	200	5	▬
	1	14-3-3zetadelta	rb	P63104	1	100	6	▲siRNA1+3
	2	4E-BP1	rbm	Q13541	1	100	6	(▲) I siRNA1-3
	3	AFP	rbm	P02771	1	100	6	▬
	6	ALDHbeta	rbm	P00325	1	100	6	▬
	7	alpha-Catenin	ms	P35221	1	100	6	(▲) I siRNA1-3
	16	Bim	rb	O43521	1	100	6	▬
	17	Bip	rb	P11021	1	100	6	▬
	18	Calnexin	ms	P27824	1	100	6	(▲) I siRNA1-3
	19	Calretikulin	rb	O15169	2	100	6	▬
	20	Calretinin	ms	P22676	1	100	6	▬
	21	Caseinkinase1delta	ms	P48730	2	1000	6	▬
	31	CD51	ms	P06756	1	100	6	▬
	32	cdc25A	rb	P30304	2	200	6	▬
	33	cdc25A-P-Ser75	rb	P30304	2	100	6	▬
	34	cdc37	rb	Q16543	1	100	6	▬
	35	CDKN2B	rb	P42772	2	100	6	▲▲
	37	c-Fos	rb	P01100	2	100	6	▬
	47	CREB	rbm	P16220	1	100	6	▬
	48	CREB-P-Ser133	rbm	P16220	1	50	6	▬
	50	Cytokeratin18	ms	P05783	1	2000	6	▲▲ siRNA1-3 III
	51	Cytokeratin19	ms	P08727	1	2000	6	▲▲ siRNA1-3 III
	52	Cytokeratin7	rb	P08729	2	100	6	▬
	53	Cytokeratin8/18	ms	P05787, P05783	1	100	6	▲▲ siRNA1-3 I+III
	55	Cytokeratin-Pan4/5/6/8/10/13/18	ms		2	4000	6	▬
	56	Cytokeratin-Pan5/6/8/17/19	ms		1	2000	6	▬
	98	HSP27	ms	P04792	1	100	6	▬
	102	HSP90	ms	P11501	2	50	6	▬
	114	Keratin	ms		1	40000	6	▬
	137	p27Kip1	ms	P46527	1	100	6	▬
	156	P-Glycoprotein	ms	P08183	1	50	6	▬
	172	Rb	ms	P06400	1	100	6	▬
	204	Survivin	ms	O15392	1	200	6	▬
	54	Cytokeratin8-P-Ser23	rbm	P05787	2	1000	7	▲ siRNA1-3 III
	62	eEF-2K	rbm	O00418	1	100	7	▬
	71	EpCAM	rb	P16422	1	100	7	▬
	82	HistonDeacetylase 2	rbm	Q92769	1	50	7	▬
	83	HistonH2B	rbm	Q5QNW6	1	100	7	▬
	84	HistonH3	rb	P68431	1	100	7	▲▲▲ I
	85	HistonH3-acetyl-Arg8/Gly13	rb	P68431	1	200	7	▲▲ I
	86	HistonH3-acetyl-Lys18	rbm	P68431	1	50	7	▬
	87	HistonH3-acetyl-Lys23	rb	P68431	1	50	7	(▲) I
	88	HistonH3-acetyl-Lys9	rbm	P68432	1	200	7	(▲) I
	89	HistonH3-dimethyl-Lys4	rbm	Q16695	1	100	7	(▲) I
	90	HistonH3-P-Ser10	rb	P68431	1	50	7	▬
	91	HistonH3-trimethyl-Lys27	rb	P68431	2	50	7	▬
	92	HistonH4	rb	P62805	2	10000	7	▬
	93	HistonH4-acetyl-Lys16	rb	P62805	2	100	7	▬
	94	HistonH4-acetyl-Lys8	rbm	P62805	1	200	7	▬
	97	HSF2	rbm	Q03933	1	100	7	▬
	99	HSP27-P-Ser15	rbm	P04792	1	50	7	▬
	100	HSP27-P-Ser78	rb	P04792	1	50	7	▬
	101	HSP27-P-Ser82	rb	P04792	2	50	7	▬
	115	KSR1-P-Ser392	rb	Q8IVT5	2	50	7	▬
	136	NPM	rb	P06748	2	100	7	▬
	138	p27Kip1-P-Ser10	rbm	P46527	1	100	7	▬
	152	PDK1	rb	Q15118	2	100	7	▬
	153	PDK1-P-Ser241	rb	Q15118	2	50	7	▬
	154	PEA15	rb	Q15121	2	100	7	▬
	159	PKACalpha/beta/gamma-P-Thr197	rb	P17612, P22694, P22612	2	50	7	▬
	160	PKCalpha/beta/gamma	rb	P17525, P05771, P05129	2	100	7	▬
	161	PKCgamma/beta2-P-Thr638/641	rb	P05129, P05771	2	50	7	▬
	164	PLCgamma1-P-Tyr783	rb	P19174	2	50	7	▬
	165	PP1alpha	rb	P62136	1	100	7	▬
	166	PP1alpha-P-Thr320	rbm	P62136	2	50	7	▬
	167	PP2AC	rbm	P67775	1	100	7	(▲) I
	169	PTP-PEST	rb	Q05209	2	200	7	▬
	170	PTPRR	rb	Q15256	2	100	8	▬
	173	Rb-P-Ser807/811	rb	P06400	1	50	8	▼▼▼
	174	RelB	rb	Q01201	2	100	8	▲
	175	RKIP	rb	P30086	2	100	8	▬
	176	RNAPolymeraseII	rt	O00472	1	100	8	▬
	177	RNAPolymeraseII-P-Ser2	rt	O00472	1	50	8	▬
	178	RNAPolymeraseII-P-Ser5	rt	O00472	1	50	8	▬
	179	RNAPolymeraseII-P-Ser7	rt	O00472	1	50	8	▬
	180	RNAPolymeraseII-P-Thr4	rt	O00472	2	50	8	▬
	187	S6RibosomalProtein	rbm	P62753	1	100	8	▬
	188	S6RibosomalProtein-P-Ser235/236	rb	P62753	1	50	8	▼▼▼
	189	SHP-2	rbm	Q06124	1	100	8	▬
	203	SuperoxiddismutaseCu/Zn	rb	P00441	1	500	8	▬
	205	TAK1	rb	O43318	1	100	8	▬
	206	TAK1-P-Ser412	rb	O43318	2	50	8	▬
	207	TCF4	rb	P15884	2	100	8	▬
